**Supplementary Table 1.** A list of genomes and which amplification and sequencing method was used in for each case.

| <b>Isolate</b> | <b>Sequencing protocol</b> |
|----------------|----------------------------|
| 20VR0189       | articV1                    |
| 20VR0195       | articV1                    |
| 20VR0206       | articV1                    |
| 20VR0275       | articV1                    |
| 20VR0276       | articV1                    |
| 20VR0334       | articV1                    |
| 20VR0461       | articV1                    |
| 20VR0635       | articV1                    |
| 20VR0174       | articV1                    |
| 20VR0759       | articV3                    |
| 20VR0760       | articV3                    |
| 20VR0766       | articV3                    |
| 20VR0769       | articV3                    |
| 20VR0993       | articV3                    |
| 20VR0997       | articV3                    |
| 20VR1000       | articV3                    |
| 20VR1019       | articV3                    |
| 20VR1020       | articV3                    |
| 20VR1076       | articV3                    |
| 20VR1108       | articV3                    |
| 20VR1109       | articV3                    |
| 20VR1114       | articV3                    |
| 20VR1271       | articV3                    |
| 20VR1275       | articV3                    |
| 20VR1276       | articV3                    |
| 20VR1279       | articV3                    |
| 20VR1280       | articV3                    |
| 20VR1282       | articV3                    |
| 20VR1283       | articV3                    |
| 20VR1289       | articV3                    |
| 20VR1292       | articV3                    |
| 20VR1293       | articV3                    |
| 20VR1449       | articV3                    |
| 20VR1453       | articV3                    |
| 20VR1454       | articV3                    |
| 20VR1499       | articV3                    |
| 20VR1616       | articV3                    |
| 20VR1617       | articV3                    |

20VR1619 articV3  
20VR1620 articV3  
20VR1621 articV3  
20VR1622 articV3  
20VR1623 articV3  
20VR1625 articV3  
20VR1626 articV3  
20VR1627 articV3  
20VR1759 articV3  
20VR1760 articV3  
20VR1765 articV3  
20VR1769 articV3  
20VR1771 articV3  
20VR1774 articV3  
20VR1777 articV3  
20VR1778 articV3  
20VR1781 articV3  
20VR1783 articV3  
20VR1784 articV3  
20VR1791 articV3  
20VR1803 articV3  
20VR1804 articV3  
20VR1805 articV3  
20VR1824 articV3  
20VR1829 articV3  
20VR1831 articV3  
20VR1836 articV3  
20VR1839 articV3  
20VR1841 articV3  
20VR1847 articV3  
20VR1850 articV3  
20VR1865 articV3  
20VR1893 articV3  
20VR1894 articV3  
20VR1896 articV3  
20VR1899 articV3  
20VR1900 articV3  
20VR1911 articV3  
20VR1915 articV3  
20VR1927 articV3  
20VR1928 articV3  
20VR1929 articV3  
20VR1930 articV3

20VR1933 articV3  
20VR1935 articV3  
20VR1945 articV3  
20VR1947 articV3  
20VR1950 articV3  
20VR1951 articV3  
20VR1952 articV3  
20VR1954 articV3  
20VR1955 articV3  
20VR1957 articV3  
20VR1962 articV3  
20VR1963 articV3  
20VR1978 articV3  
20VR1980 articV3  
20VR1981 articV3  
20VR1984 articV3  
20VR1985 articV3  
20VR1986 articV3  
20VR1987 articV3  
20VR1992 articV3  
20VR1995 articV3  
20VR2001 articV3  
20VR2005 articV3  
20VR2010 articV3  
20VR2011 articV3  
20VR2012 articV3  
20VR2019 articV3  
20VR2020 articV3  
20VR2022 articV3  
20VR2024 articV3  
20VR2025 articV3  
20VR2038 articV3  
20VR2041 articV3  
20VR2042 articV3  
20VR2046 articV3  
20VR2048 articV3  
20VR2050 articV3  
20VR2052 articV3  
20VR2053 articV3  
20VR2054 articV3  
20VR2055 articV3  
20VR2056 articV3  
20VR2060 articV3

20VR2062 articV3  
20VR2066 articV3  
20VR2071 articV3  
20VR2072 articV3  
20VR2080 articV3  
20VR2082 articV3  
20VR2083 articV3  
20VR2089 articV3  
20VR2091 articV3  
20VR2098 articV3  
20VR2106 articV3  
20VR2108 articV3  
20VR2109 articV3  
20VR2472 articV3  
20VR2473 articV3  
20VR2477 articV3  
20VR2478 articV3  
20VR2479 articV3  
20VR2481 articV3  
20VR2483 articV3  
20VR2484 articV3  
20VR2487 articV3  
20VR2493 articV3  
20VR2499 articV3  
20VR2500 articV3  
20VR2504 articV3  
20VR2505 articV3  
20VR2506 articV3  
20VR2516 articV3  
20VR2518 articV3  
20VR2521 articV3  
20VR2524 articV3  
20VR2525 articV3  
20VR2528 articV3  
20VR2529 articV3  
20VR2531 articV3  
20VR2532 articV3  
20VR2534 articV3  
20VR2536 articV3  
20VR2537 articV3  
20VR2540 articV3  
20VR2541 articV3  
20VR2550 articV3

20VR2559 articV3  
20VR2562 articV3  
20VR2563 articV3  
20VR2572 articV3  
20VR2584 articV3  
20VR2585 articV3  
20VR2586 articV3  
20VR2647 articV3  
20VR2648 articV3  
20VR2649 articV3  
20VR2650 articV3  
20VR2651 articV3  
20VR2652 articV3  
20VR2653 articV3  
20VR2654 articV3  
20VR2656 articV3  
20VR2657 articV3  
20VR2659 articV3  
20VR2660 articV3  
20VR2662 articV3  
20VR2663 articV3  
20VR2666 articV3  
20VR2667 articV3  
20VR2669 articV3  
20VR2670 articV3  
20VR2671 articV3  
20VR2711 articV3  
20VR2712 articV3  
20VR2713 articV3  
20VR2714 articV3  
20VR2715 articV3  
20VR2716 articV3  
20VR2717 articV3  
20VR2718 articV3  
20VR2719 articV3  
20VR2720 articV3  
20VR2721 articV3  
20VR2722 articV3  
20VR2723 articV3  
20VR2724 articV3  
20VR2726 articV3  
20VR2727 articV3  
20VR2730 articV3

20VR2731 articV3  
20VR2732 articV3  
20VR2733 articV3  
20VR2918 articV3  
20VR2919 articV3  
20VR2920 articV3  
20VR2922 articV3  
20VR2923 articV3  
20VR2924 articV3  
20VR2925 articV3  
20VR2926 articV3  
20VR2928 articV3  
20VR2929 articV3  
20VR2930 articV3  
20VR2933 articV3  
20VR2934 articV3  
20VR2935 articV3  
20VR2936 articV3  
20VR2937 articV3  
20VR2940 articV3  
20VR2942 articV3  
20VR2943 articV3  
20VR2944 articV3  
20VR2946 articV3  
20VR2947 articV3  
20VR2948 articV3  
20VR2949 articV3  
20VR2950 articV3  
20VR2951 articV3  
20VR2952 articV3  
20VR2953 articV3  
20VR2955 articV3  
20VR2956 articV3  
20VR2957 articV3  
20VR2958 articV3  
20VR2959 articV3  
20VR3006 articV3  
20VR3007 articV3  
20VR3009 articV3  
20VR3012 articV3  
20VR3016 articV3  
20VR3017 articV3  
20VR3024 articV3

20VR3025 articV3  
20VR3026 articV3  
20VR3027 articV3  
20VR3029 articV3  
20VR3030 articV3  
20VR3031 articV3  
20VR3032 articV3  
20VR3033 articV3  
20VR3034 articV3  
20VR3036 articV3  
20VR3037 articV3  
20VR3038 articV3  
20VR3040 articV3  
20VR3044 articV3  
20VR3056 articV3  
20VR3060 articV3  
20VR3061 articV3  
20VR3062 articV3  
20VR3063 articV3  
20VR3066 articV3  
20VR3068 articV3  
20VR3070 articV3  
20VR3071 articV3  
20VR3076 articV3  
20VR3084 articV3  
20VR3088 articV3  
20VR3089 articV3  
20VR3096 articV3  
20VR3098 articV3  
20VR3099 articV3  
20VR3112 articV3  
20VR3128 articV3  
20VR3135 articV3  
20VR3137 articV3  
20VR3139 articV3  
20VR3140 articV3  
20VR3141 articV3  
20VR3142 articV3  
20VR3144 articV3  
20VR3145 articV3  
20VR3146 articV3  
20VR3147 articV3  
20VR3151 articV3

20VR3152 articV3  
20VR3156 articV3  
20VR3157 articV3  
20VR3159 articV3  
20VR3160 articV3  
20VR3161 articV3  
20VR3162 articV3  
20VR3165 articV3  
20VR3167 articV3  
20VR3168 articV3  
20VR3170 articV3  
20VR3171 articV3  
20VR3173 articV3  
20VR3175 articV3  
20VR3176 articV3  
20VR3177 articV3  
20VR3178 articV3  
20VR3186 articV3  
20VR3187 articV3  
20VR3188 articV3  
20VR3190 articV3  
20VR3192 articV3  
20VR3194 articV3  
20VR3195 articV3  
20VR3197 articV3  
20VR3198 articV3  
20VR3201 articV3  
20VR3202 articV3  
20VR3204 articV3  
20VR3205 articV3  
20VR3206 articV3  
20VR3207 articV3  
20VR3476 articV3  
20VR3477 articV3  
20VR3480 articV3  
20VR3481 articV3  
20VR3482 articV3  
20VR3483 articV3  
20VR3486 articV3  
20VR3489 articV3  
20VR3490 articV3  
20VR3491 articV3  
20VR3493 articV3



20VR0462 nsw  
20VR0465 nsw  
20VR0514 nsw  
20VR0999 nsw  
20VR0995 nsw  
20VR0994 nsw  
20VR0996 nsw  
20VR0761 nsw  
20VR0770 nsw  
20VR0989 nsw  
20VR3185 nsw  
20VR1018 nsw  
20VR3136 nsw  
20VR0987 nsw  
20VR1285 nsw  
20VR1004 nsw  
20VR1290 nsw  
20VR1286 nsw  
20VR0712 nsw  
20VR1110 nsw  
20VR1022 nsw  
20VR3143 nsw  
20VR1115 nsw  
20VR1278 nsw  
20VR1277 nsw  
20VR0933 nsw  
20VR0914 nsw  
20VR0901 nsw  
20VR1274 nsw  
20VR1273 nsw  
20VR1450 nsw  
20VR1016 nsw  
20VR1291 nsw  
20VR1298 nsw  
20VR1297 nsw  
20VR1113 nsw  
20VR1272 nsw  
20VR1281 nsw  
20VR1452 nsw  
20VR3149 nsw  
20VR1792 nsw  
20VR1793 nsw  
20VR1794 nsw

20VR1799 nsw  
20VR1795 nsw  
20VR1798 nsw  
20VR1078 nsw  
20VR1451 nsw  
20VR3150 nsw  
20VR2471 nsw  
20VR3163 nsw  
20VR1797 nsw  
20VR2474 nsw  
20VR2556 nsw  
20VR2573 nsw  
20VR1796 nsw  
20VR2558 nsw  
20VR1888 nsw  
20VR3154 nsw  
20VR2571 nsw  
20VR3155 nsw  
20VR1618 nsw  
20VR2476 nsw  
20VR2490 nsw  
20VR2475 nsw  
20VR2489 nsw  
20VR2488 nsw  
20VR2485 nsw  
20VR2486 nsw  
20VR2494 nsw  
20VR2491 nsw  
20VR2495 nsw  
20VR1192 nsw  
20VR2492 nsw  
20VR2497 nsw  
20VR2498 nsw  
20VR3158 nsw  
20VR1133 nsw  
20VR1624 nsw  
20VR1615 nsw  
20VR3164 nsw  
20VR2503 nsw  
20VR2501 nsw  
20VR2574 nsw  
20VR2557 nsw  
20VR3166 nsw

20VR1756 nsw  
20VR2507 nsw  
20VR1380 nsw  
20VR2519 nsw  
20VR2517 nsw  
20VR2520 nsw  
20VR2522 nsw  
20VR1764 nsw  
20VR1758 nsw  
20VR3172 nsw  
20VR3169 nsw  
20VR1775 nsw  
20VR2526 nsw  
20VR2560 nsw  
20VR1988 nsw  
20VR2576 nsw  
20VR2561 nsw  
20VR2552 nsw  
20VR3180 nsw  
20VR1782 nsw  
20VR1993 nsw  
20VR2527 nsw  
20VR1581 nsw  
20VR2538 nsw  
20VR2530 nsw  
20VR2579 nsw  
20VR2013 nsw  
20VR1779 nsw  
20VR1773 nsw  
20VR2539 nsw  
20VR2555 nsw  
20VR1780 nsw  
20VR1776 nsw  
20VR2554 nsw  
20VR1772 nsw  
20VR2000 nsw  
20VR2570 nsw  
20VR1597 nsw  
20VR3179 nsw  
20VR3022 nsw  
20VR3196 nsw  
20VR1990 nsw  
20VR3181 nsw

20VR3182 nsw  
20VR1561 nsw  
20VR2535 nsw  
20VR1825 nsw  
20VR1821 nsw  
20VR1822 nsw  
20VR1826 nsw  
20VR1827 nsw  
20VR1823 nsw  
20VR3183 nsw  
20VR1820 nsw  
20VR1818 nsw  
20VR1848 nsw  
20VR1817 nsw  
20VR1815 nsw  
20VR1813 nsw  
20VR1819 nsw  
20VR1816 nsw  
20VR1851 nsw  
20VR1814 nsw  
20VR1852 nsw  
20VR1996 nsw  
20VR1991 nsw  
20VR1997 nsw  
20VR1998 nsw  
20VR1842 nsw  
20VR2581 nsw  
20VR3191 nsw  
20VR2546 nsw  
20VR2547 nsw  
20VR2533 nsw  
20VR2549 nsw  
20VR1853 nsw  
20VR2545 nsw  
20VR1994 nsw  
20VR2544 nsw  
20VR1838 nsw  
20VR1828 nsw  
20VR1812 nsw  
20VR1806 nsw  
20VR1808 nsw  
20VR1807 nsw  
20VR1811 nsw

20VR1809 nsw  
20VR1846 nsw  
20VR2003 nsw  
20VR1843 nsw  
20VR1840 nsw  
20VR1844 nsw  
20VR1845 nsw  
20VR1833 nsw  
20VR1837 nsw  
20VR3200 nsw  
20VR2941 nsw  
20VR2006 nsw  
20VR2004 nsw  
20VR1830 nsw  
20VR1949 nsw  
20VR2009 nsw  
20VR1835 nsw  
20VR1858 nsw  
20VR2007 nsw  
20VR1856 nsw  
20VR1857 nsw  
20VR2932 nsw  
20VR3210 nsw  
20VR3203 nsw  
20VR2017 nsw  
20VR2016 nsw  
20VR3011 nsw  
20VR2018 nsw  
20VR1862 nsw  
20VR1864 nsw  
20VR3010 nsw  
20VR1863 nsw  
20VR1860 nsw  
20VR1861 nsw  
20VR1917 nsw  
20VR1867 nsw  
20VR1859 nsw  
20VR1868 nsw  
20VR2027 nsw  
20VR2031 nsw  
20VR2030 nsw  
20VR2029 nsw  
20VR2026 nsw

20VR2036 nsw  
20VR1916 nsw  
20VR1895 nsw  
20VR1889 nsw  
20VR1897 nsw  
20VR1890 nsw  
20VR1891 nsw  
20VR3209 nsw  
20VR3208 nsw  
20VR1940 nsw  
20VR1908 nsw  
20VR1913 nsw  
20VR1904 nsw  
20VR1903 nsw  
20VR1901 nsw  
20VR1914 nsw  
20VR1907 nsw  
20VR1887 nsw  
20VR2045 nsw  
20VR1944 nsw  
20VR2051 nsw  
20VR1943 nsw  
20VR2021 nsw  
20VR2023 nsw  
20VR2076 nsw  
20VR2077 nsw  
20VR2067 nsw  
20VR2093 nsw  
20VR1924 nsw  
20VR1923 nsw  
20VR2088 nsw  
20VR2085 nsw  
20VR3039 nsw  
20VR1925 nsw  
20VR2095 nsw  
20VR1931 nsw  
20VR2096 nsw  
20VR1921 nsw  
20VR2092 nsw  
20VR1936 nsw  
20VR1946 nsw  
20VR2065 nsw  
20VR1961 nsw

20VR1965 nsw  
20VR3041 nsw  
20VR2059 nsw  
20VR1959 nsw  
20VR1960 nsw  
20VR2058 nsw  
20VR1964 nsw  
20VR1956 nsw  
20VR2063 nsw  
20VR2068 nsw  
20VR2061 nsw  
20VR1979 nsw  
20VR1982 nsw  
20VR3014 nsw  
20VR2105 nsw  
20VR2101 nsw  
20VR2094 nsw  
20VR2075 nsw  
20VR2078 nsw  
20VR2074 nsw  
20VR2079 nsw  
20VR2073 nsw  
20VR3019 nsw  
20VR2103 nsw  
20VR2081 nsw  
20VR3004 nsw  
20VR3003 nsw  
20VR3005 nsw  
20VR3045 nsw  
20VR3075 nsw  
20VR3110 nsw  
20VR3064 nsw  
20VR3117 nsw  
20VR3093 nsw  
20VR0765 nsw  
20VR0990 nsw  
20VR1870 nsw  
20VR1910 nsw  
20VR1941 nsw  
20VR1948 nsw  
20VR1999 nsw  
20VR2002 nsw  
20VR2049 nsw

20VR2097 nsw  
20VR2482 nsw  
20VR2548 nsw  
20VR3008 nsw  
20VR3116 nsw  
20VR3119 nsw  
20VR3138 nsw  
20VR2086 nsw  
20VR3065 nsw
